# Supplementary material for: Physicochemical and Functional Characteristics of RD43 Rice Flour and Its Food Application
Source: MDPI journal article supplement (doi:10.3390/foods9121912), 2020-12-21
Supplement: s1 [file s1]

# Physicochemical and functional characteristics of RD43 rice flour and its food application

Phim on Suklaew, Charoonsri Chusak and Sirichai Adisakwattana \*

Phytochemical and Functional Food Research Unit for Clinical Nutrition, Department of Nutrition and Dietetics, Faculty of Allied Health Sciences, Chulalongkorn University, Bangkok, 10330, Thailand;

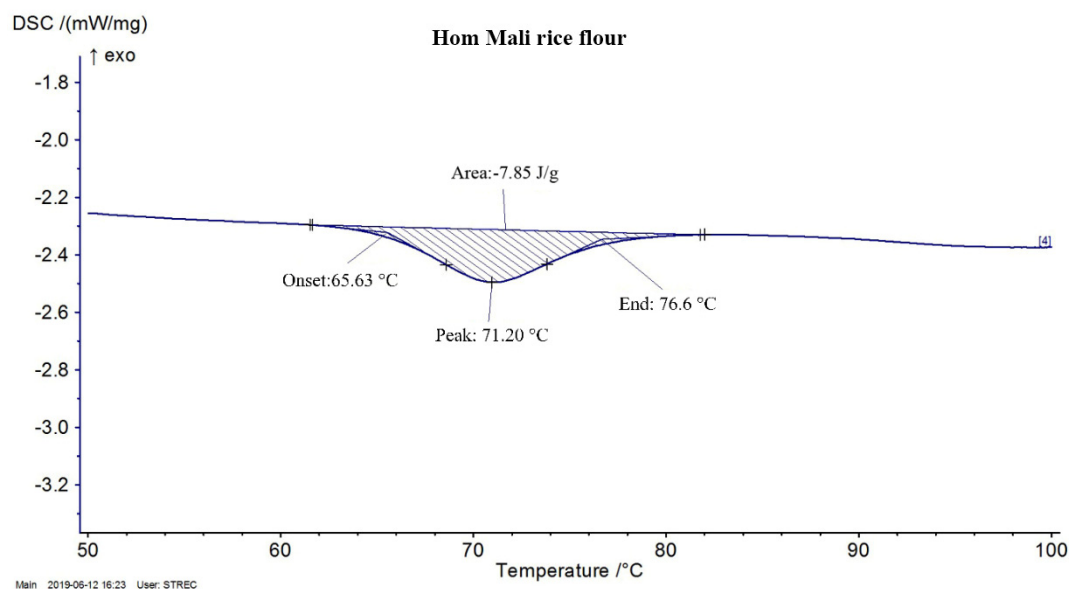

(a)

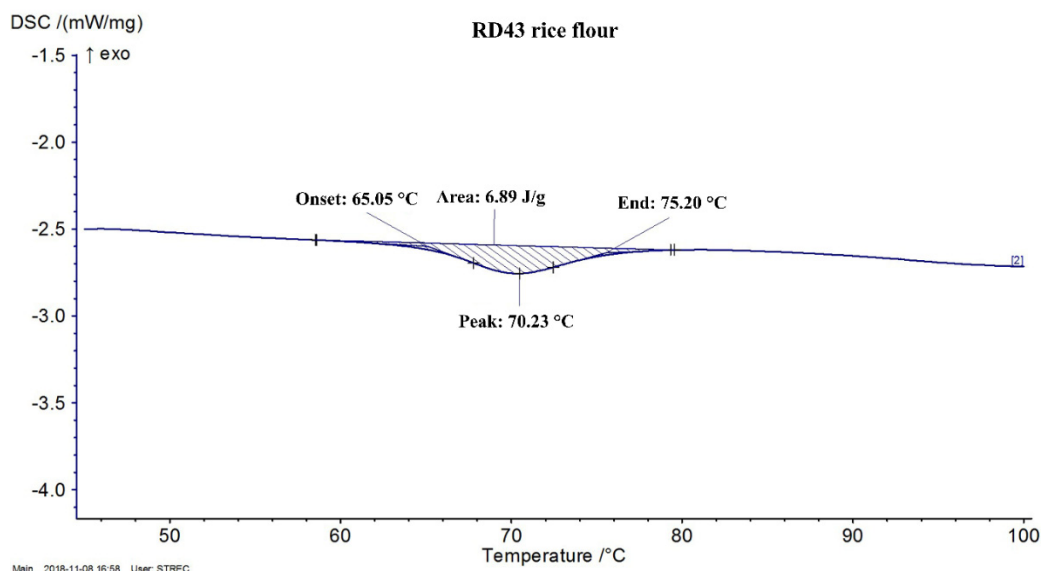

(b)

**Supplementary Figure 1.** Differential scanning calorimetry (DSC) curves of (a) Hom Mali and (b) RD43 rice flour.
